# Supplementary material for: Evaluation of extreme temperature events as simulated by CMIP6 models over Central Africa
Source: Research Square preprint supplement (doi:10.21203/rs.3.rs-7155223/v1), 2025-08-20
Supplement: Supplementary file 1 [file 1f4a0ea53bee8c9b6fc68334.pdf]

## Supplementary Material for

# Evaluation of extreme temperature events as simulated by CMIP6 models over Central Africa

**Gabriel Fotso-Kamga<sup>1,2,\*</sup>, Thierry C. Fotso-Nguemo<sup>1,2,3</sup>, Zéphirin D. Yepdo<sup>1,3</sup>, Alain T. Tamoffo<sup>1,6</sup>, Zakariah Ngavom<sup>1,2</sup>, Sinclair Zebaze<sup>1,4</sup>, Cyrille K. Kayimbo<sup>7</sup>, Derbetini A. Vondou<sup>1</sup> and Arona Diedhiou<sup>2,5</sup>**

<sup>1</sup>Laboratory for Environmental Modelling and Atmospheric Physics (LEMAP), Department of Physics, Faculty of Science, University of Yaounde 1, P.O. Box 812 Yaounde, Cameroon

<sup>2</sup>Laboratoire Mixte International “Nexus Climat-Eau-Énergie-Agriculture en Afrique de l’Ouest et Services Climatiques” (LMI NEXUS), Université Félix Houphouët-Boigny, P.O. Box 463 Abidjan, Côte d’Ivoire

<sup>3</sup>Climate Change Research Laboratory (CCRL), National Institute of Cartography, P.O. Box 157 Yaounde, Cameroon

<sup>4</sup>Department of Earth and Atmospheric Sciences, Indiana University, Bloomington, IN, USA

<sup>5</sup>University of Grenoble Alpes, IRD, CNRS, Grenoble INP, IGE, 38000 Grenoble, France

<sup>6</sup>Climate Service Center Germany (GERICS), Helmholtz-Zentrum Hereon, Hamburg, Germany

<sup>7</sup>Research Unit of Industrial and Systems Engineering Environment (UR-ISIE), IUT/FV Bandjoun, University of Dschang, PO Box 134 Bandjoun, Cameroon

### **Contents of this file**

Figures S1 to S8

**\*Corresponding author:** Gabriel Fotso-Kamga (kamga\_fotso@yahoo.fr)

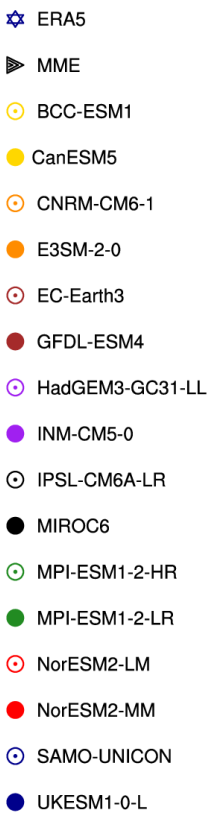

**Fig. S1:** Taylor diagram analysis showing the annual values for **a) percentile based indices** i.e., 90th percentile of maximum temperature (T90), 10th percentile of minimum temperature (T10), Warm days (TX90p) and Cool nights (TN10p); **b) duration based indices** i.e., Warm spell days index (WSDI) and Cold spell days index (CSDI); and **c) absolute based indice** i.e., Diurnal temperature range (DTR), derived from ERA5, MME and individual CMIP6 simulation members, averaged over the Central African domain, during the period 1985-2014. CHIRTS has been considered here as reference dataset

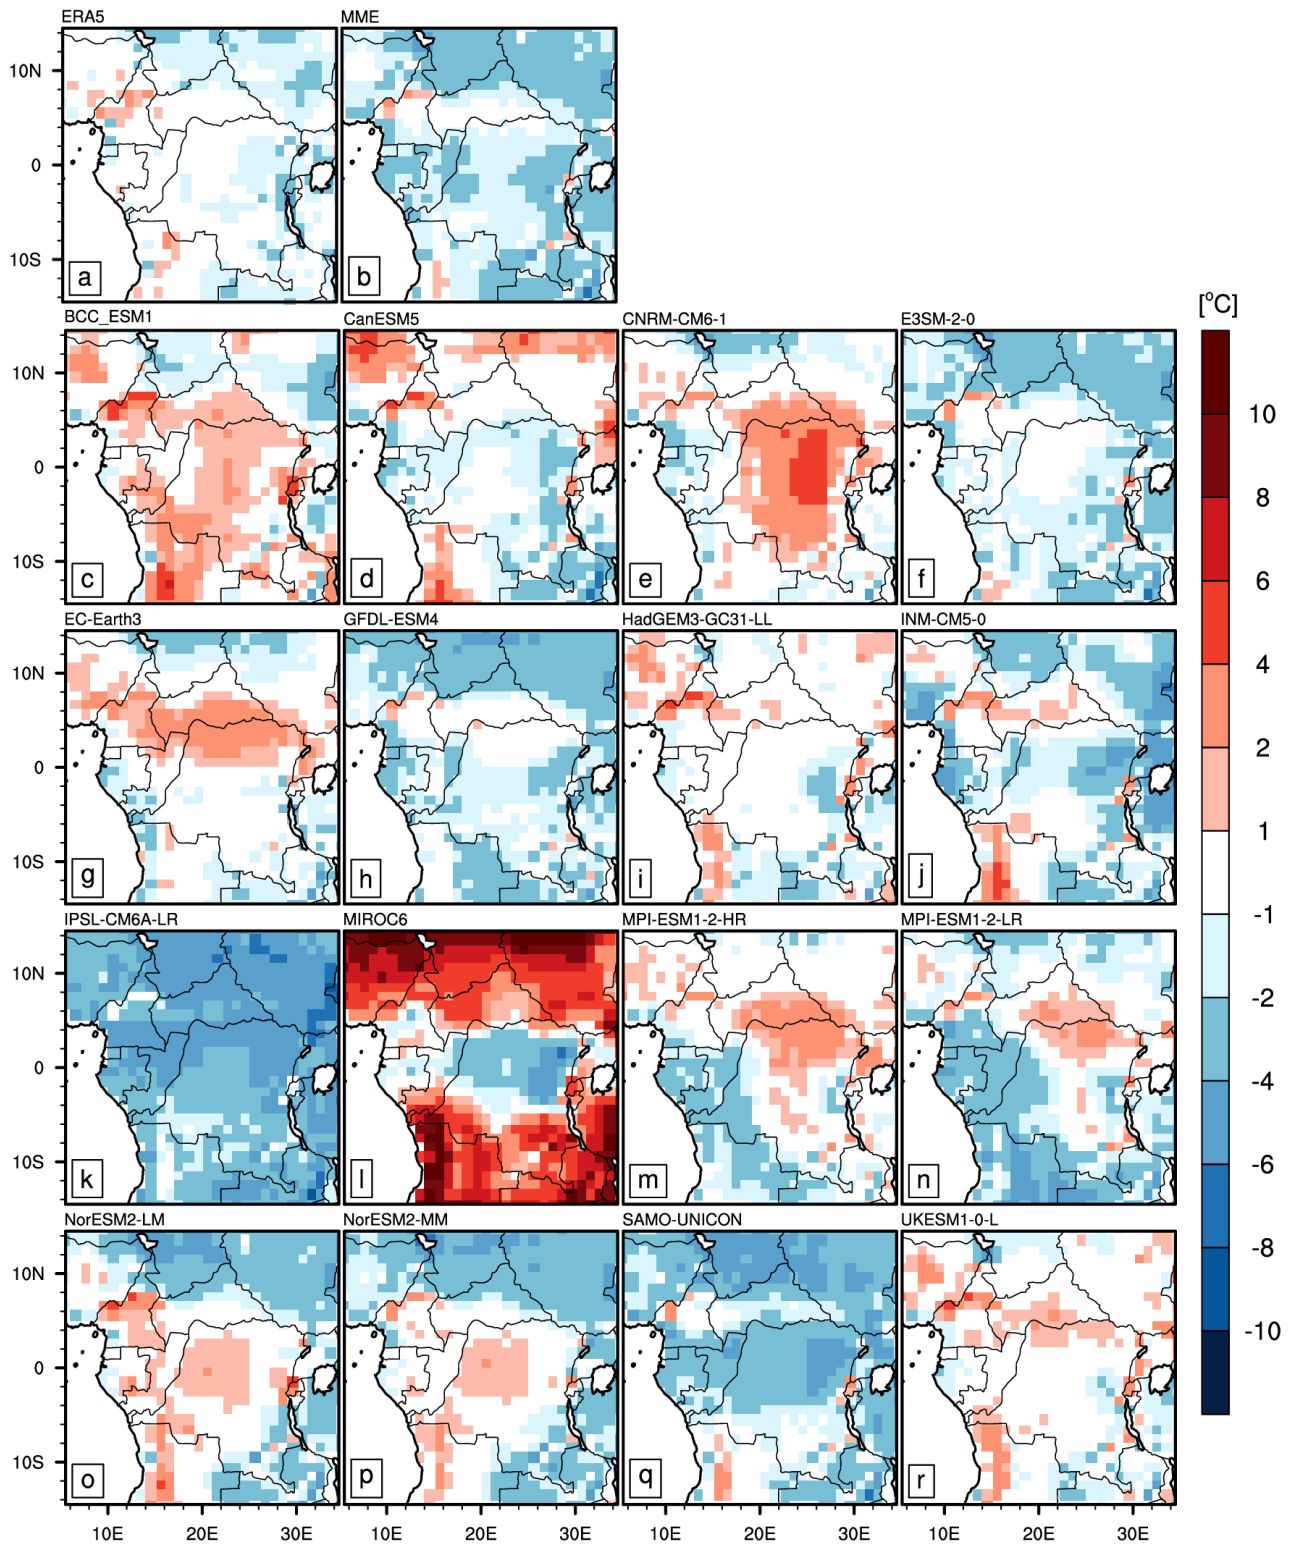

**Fig. S2:** Mean (1985–2014) spatial distribution of biases of the T90 (in °C), with respect to CHIRTS from a) ERA5, b) MME and c-r) individual CMIP6 simulation members.

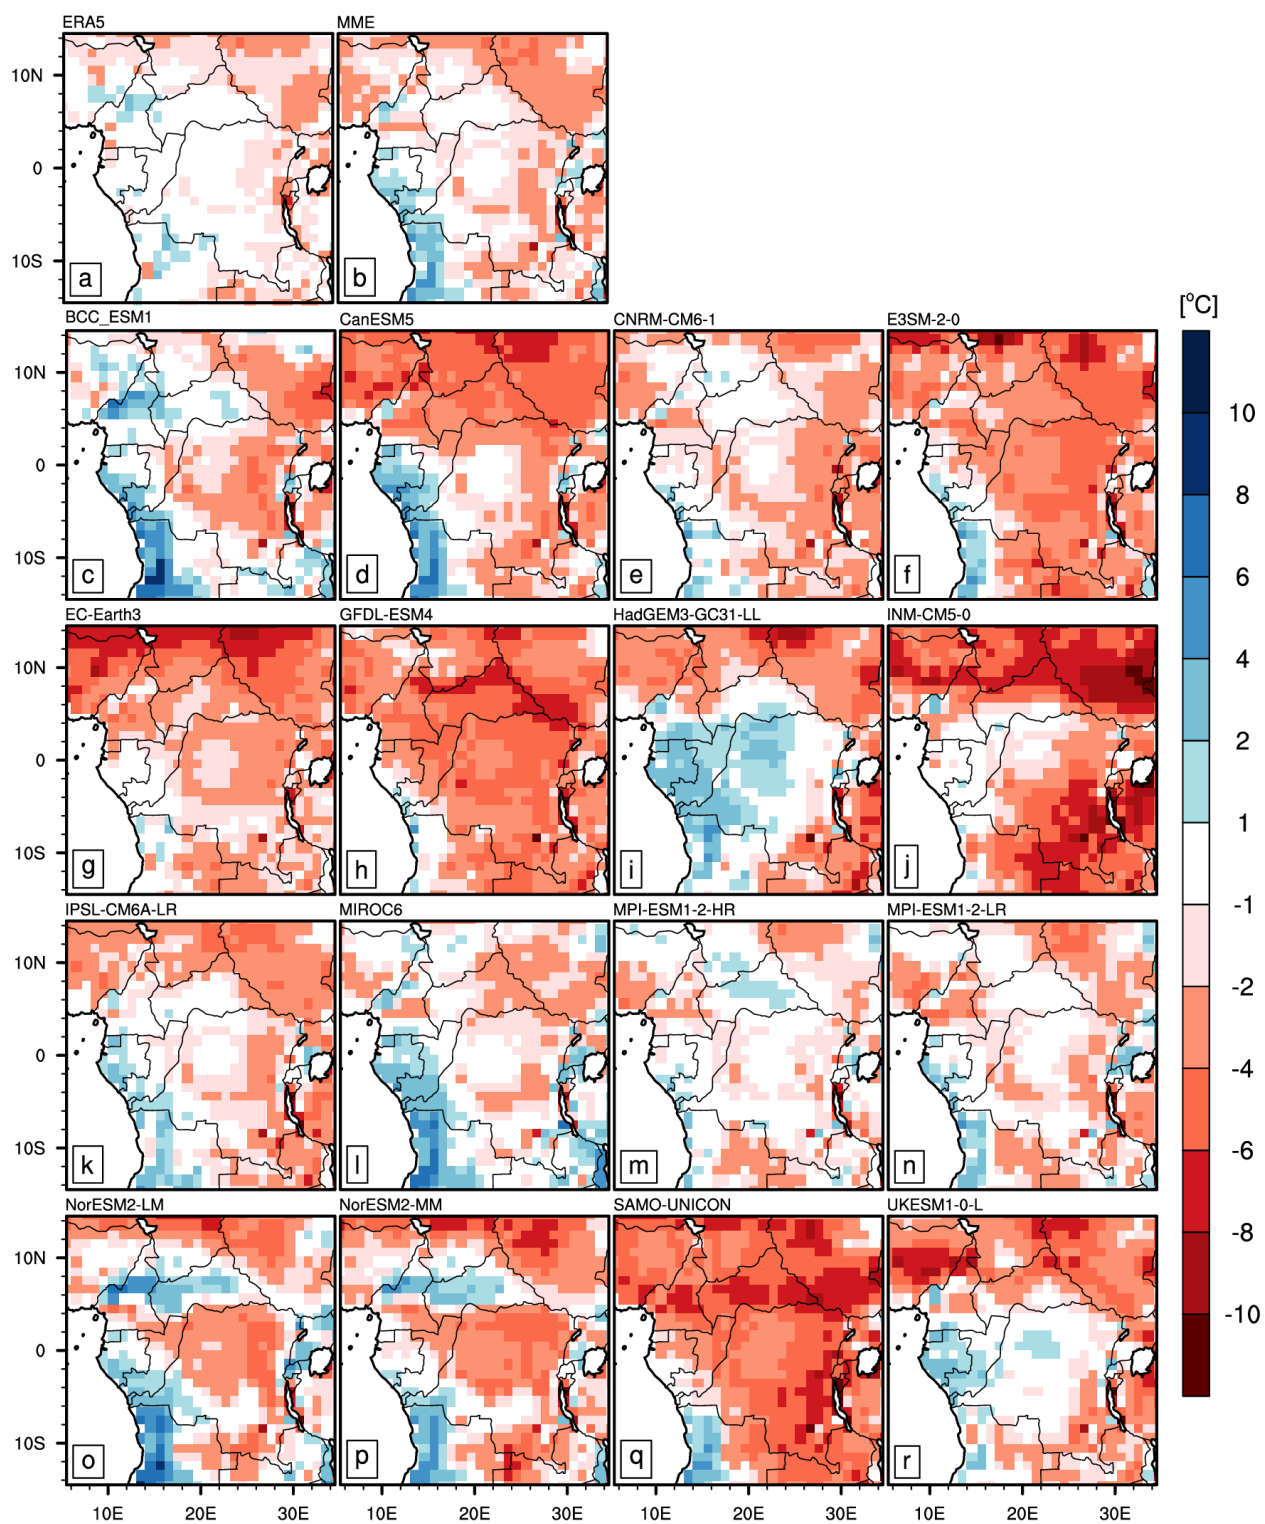

**Fig. S3:** Mean (1985–2014) spatial distribution of biases of the T10 (in °C), with respect to CHIRTS from a) ERA5, b) MME and c-r) individual CMIP6 simulation members.

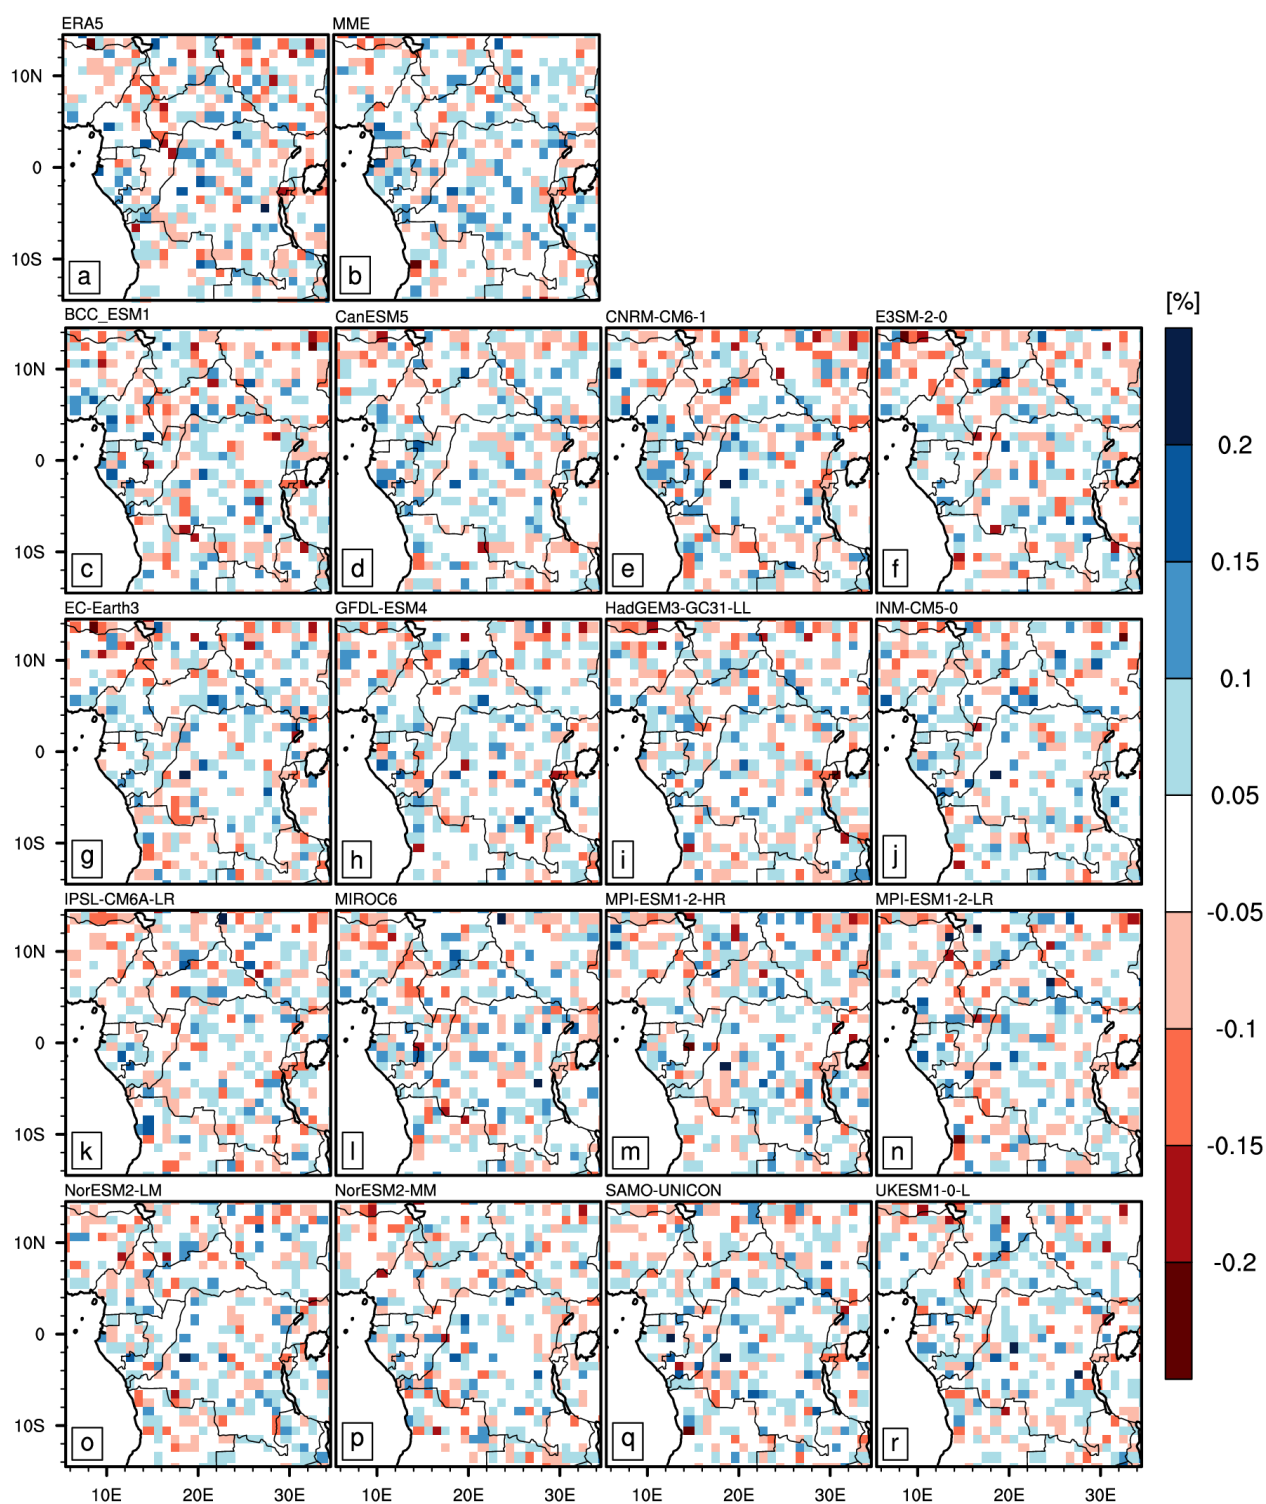

**Fig. S4:** Mean (1985–2014) spatial distribution of biases of the TX90p (in %), with respect to CHIRTS from a) ERA5, b) MME and c-r) individual CMIP6 simulation members.

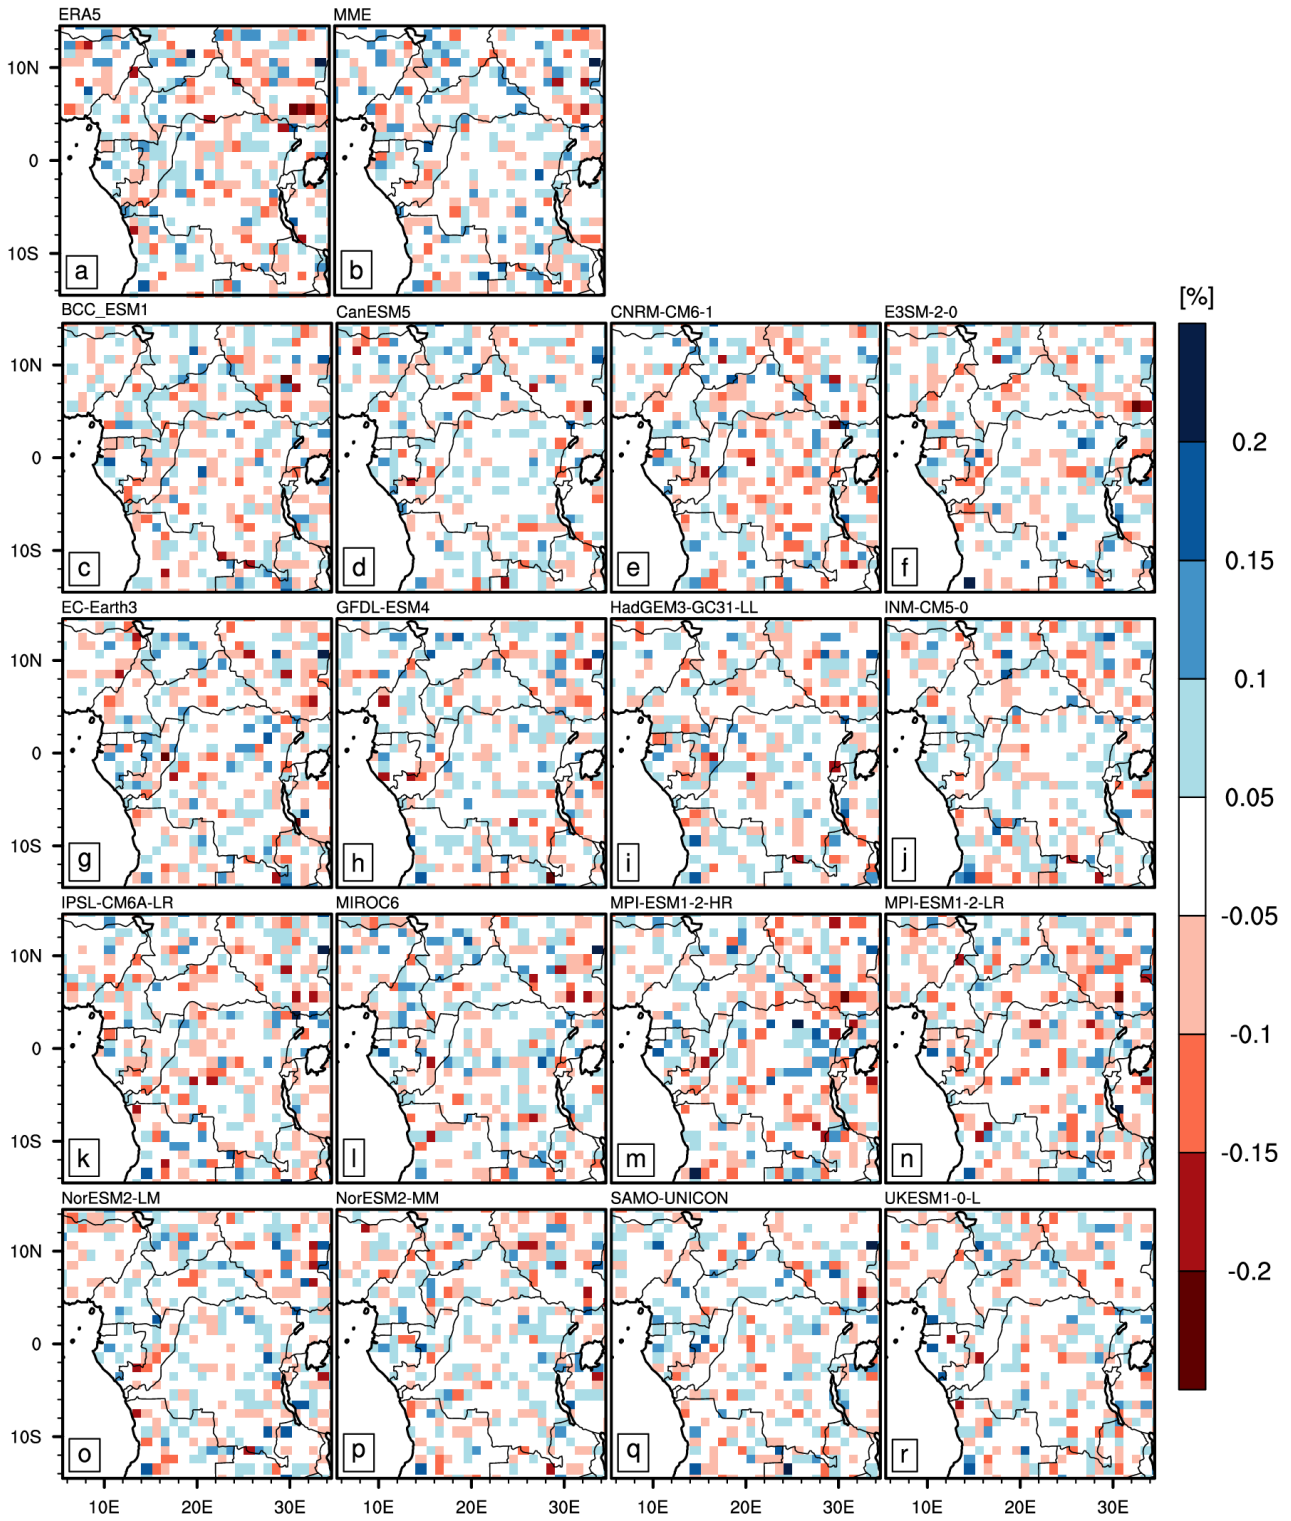

**Fig. S5:** Mean (1985–2014) spatial distribution of biases of the TN10p (in %), with respect to CHIRTS from a) ERA5, b) MME and c-r) individual CMIP6 simulation members.



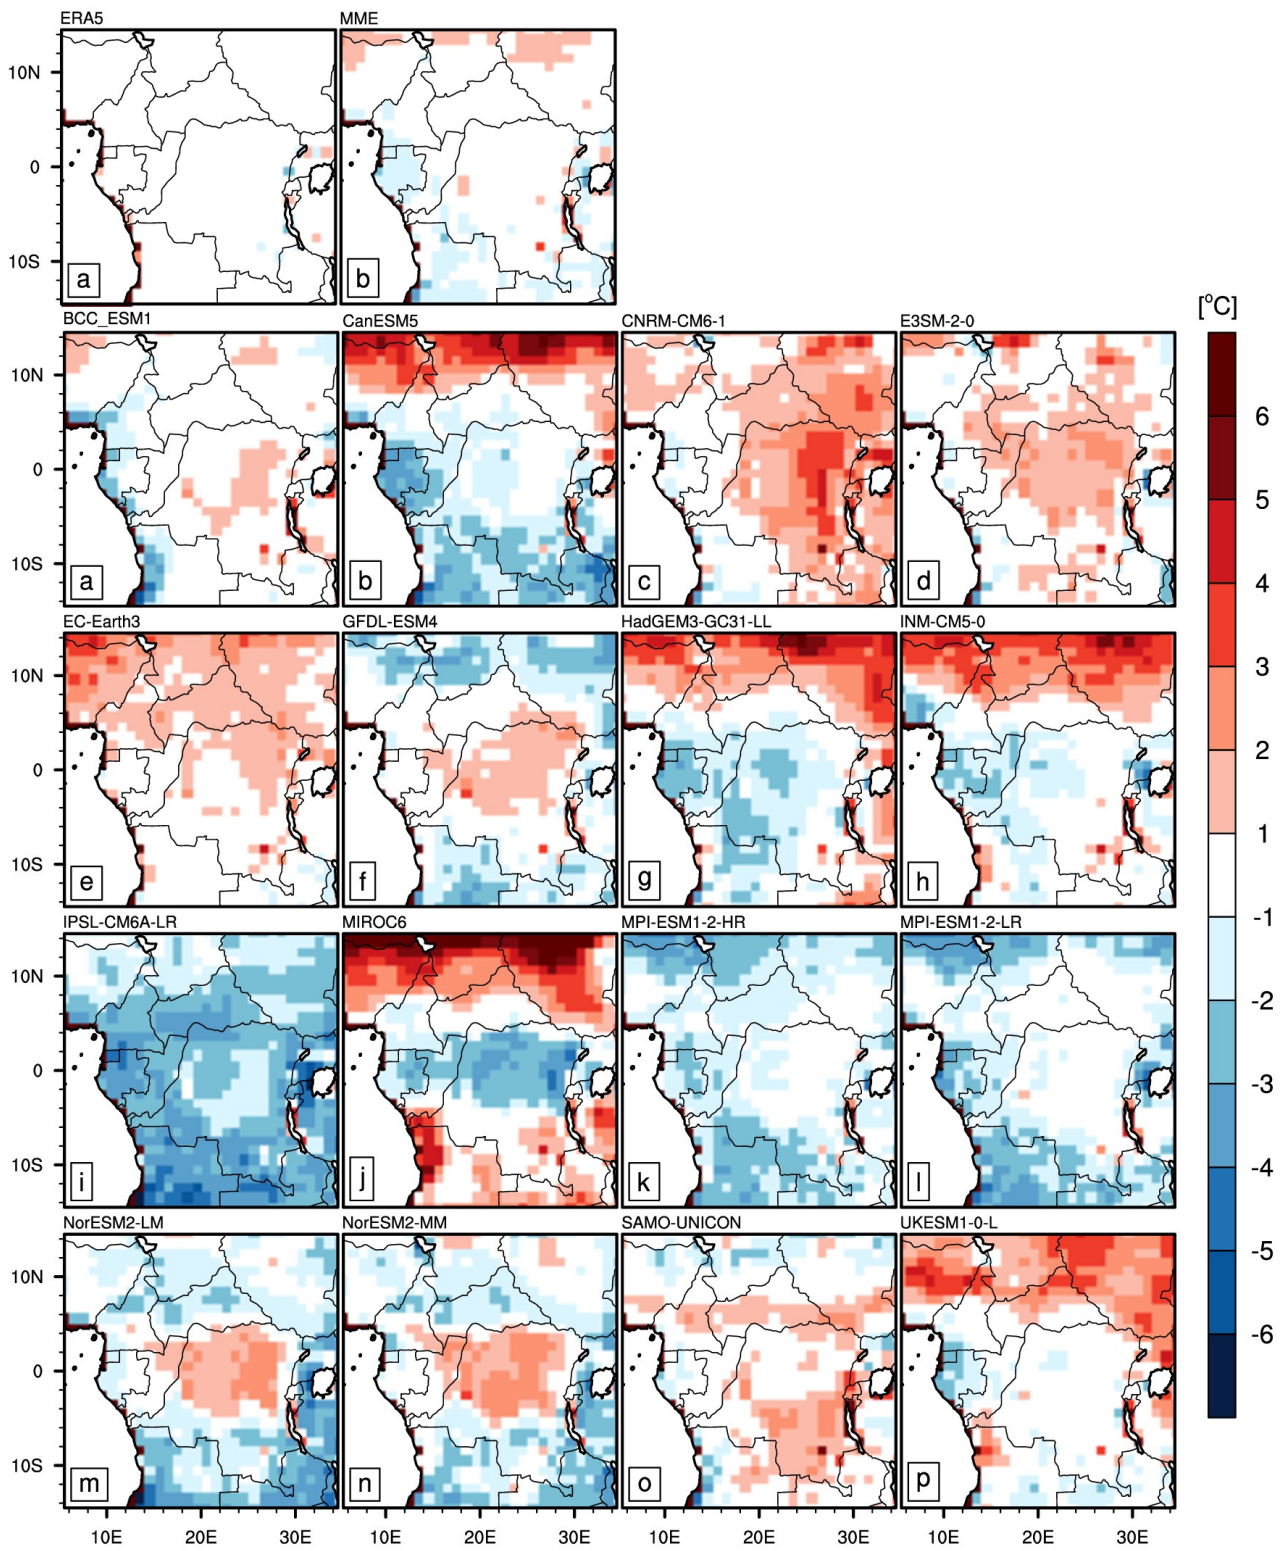

**Fig. S6:** Mean (1985–2014) spatial distribution of biases of the DTR (in  $^{\circ}\text{C}$ ), with respect to CHIRTS from a) ERA5, b) MME and c-r) individual CMIP6 simulation members.

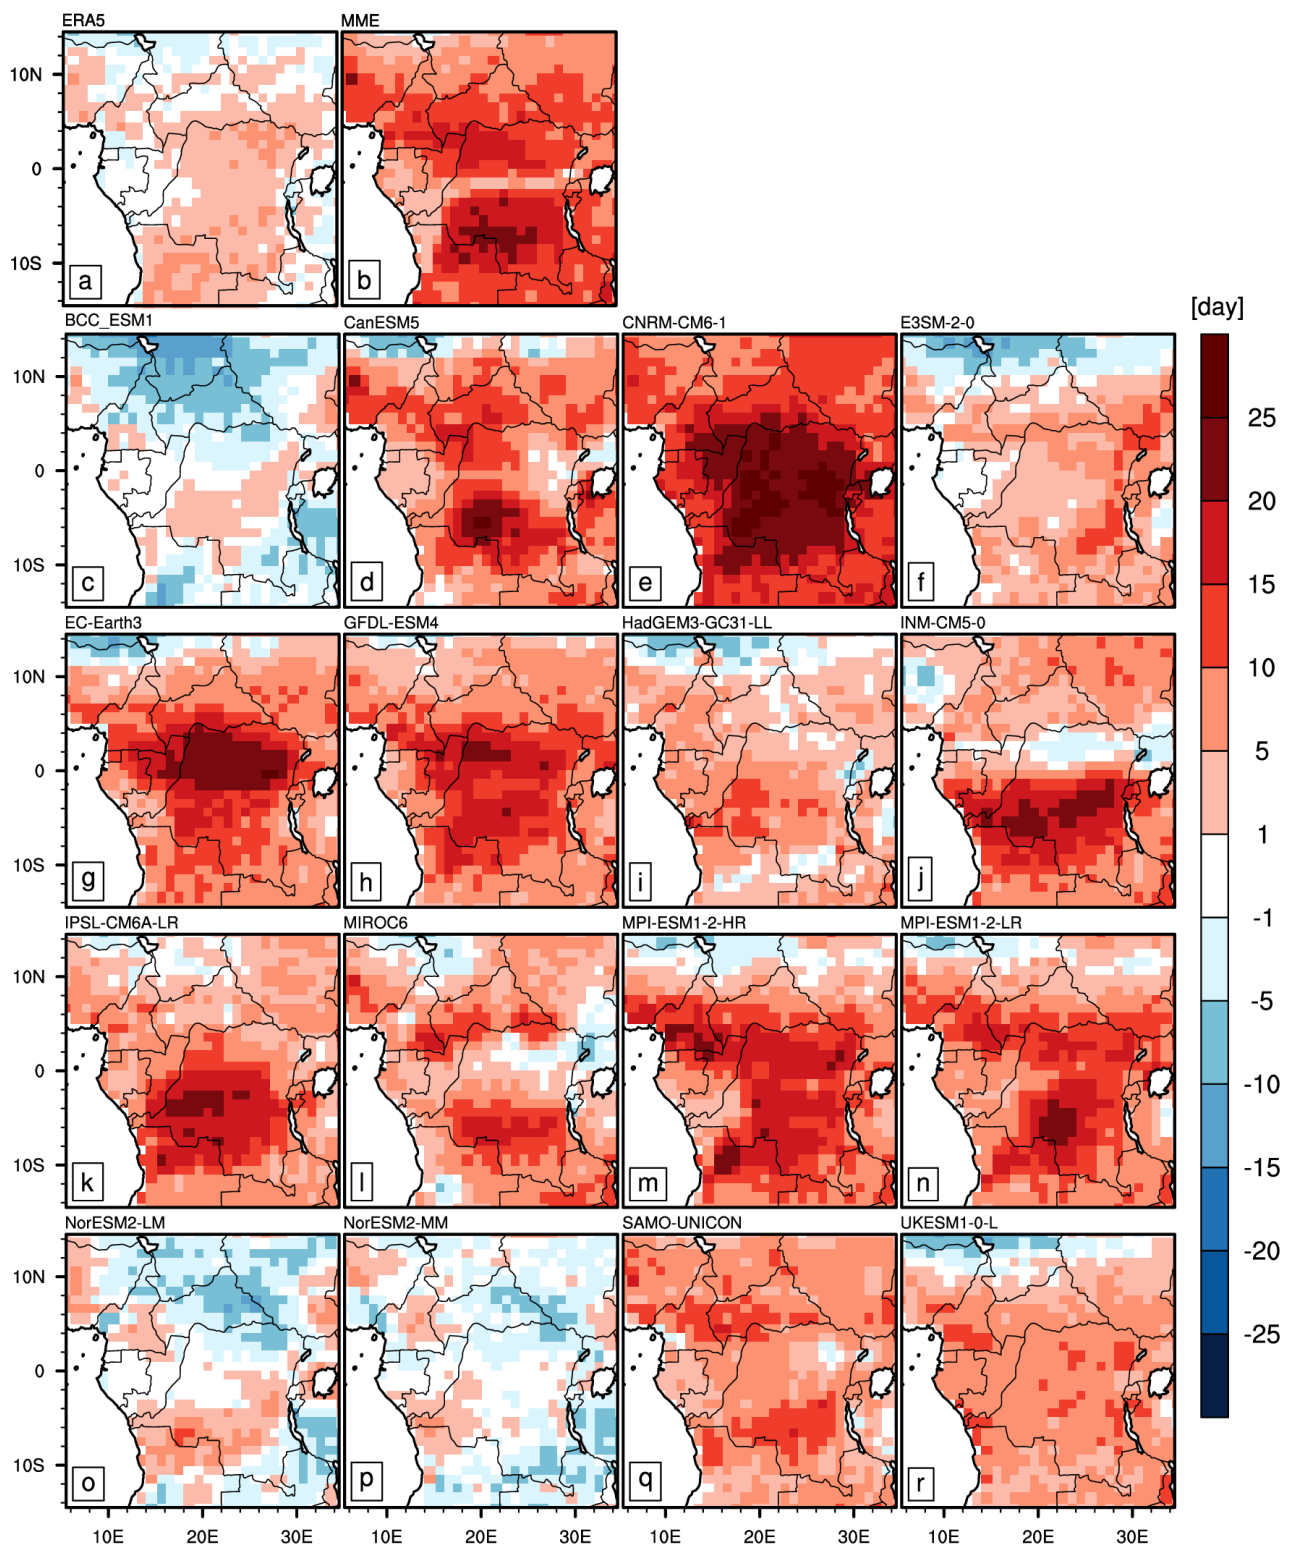

**Fig. S7:** Mean (1985–2014) spatial distribution of biases of the WSDI (in day), with respect to CHIRTS from a) ERA5, b) MME and c-r) individual CMIP6 simulation members.



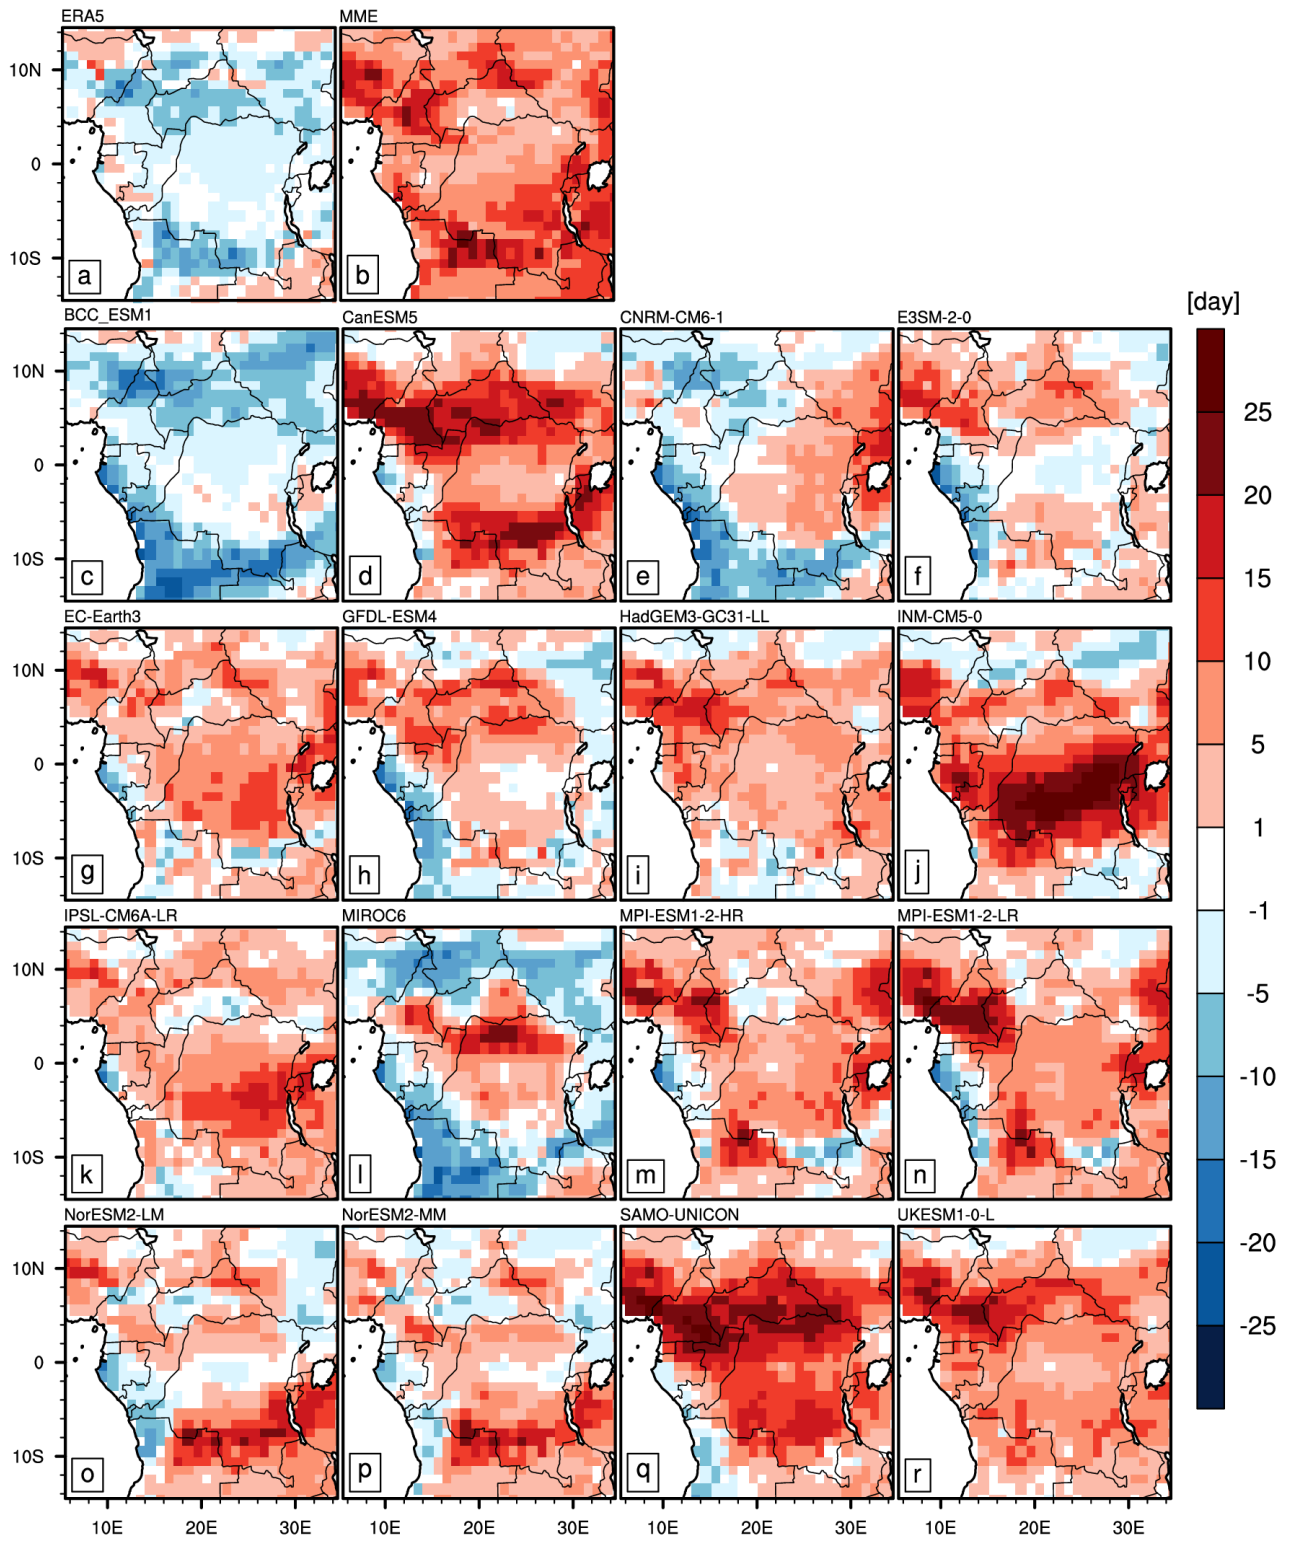

**Fig. S8:** Mean (1985–2014) spatial distribution of biases of the of the CSDI (in day), with respect to CHIRTS from a) ERA5, b) MME and c-r) individual CMIP6 simulation members.
